# Supplementary material for: Ligand geometry directs the packing and symmetry of one-dimensional helical motifs in lead oxide naphthoates and biphenylcarboxylates
Source: Royal Society of Chemistry journal article supplement (doi:10.1039/d0ce01150a), 2020-01-01
Supplement: d0ce01150a1.pdf [file d0ce01150a1.pdf]

Electronic Supplementary Information for  
Ligand Geometry Directs the Packing and Symmetry of One-Dimensional Helical  
Motifs in Lead Oxide Naphthoates and Biphenylcarboxylates

Arden C. Hammer,<sup>a</sup> Xiwen Jia,<sup>b</sup> Matthias Zeller,<sup>c</sup> Ezra J. Coughlin,<sup>c</sup> Weiguo Zhang,<sup>d</sup> and  
Catherine M. Oertel<sup>a,\*</sup>

<sup>a</sup>Department of Chemistry and Biochemistry, Oberlin College  
119 Woodland St., Oberlin, OH 44074, United States

<sup>b</sup>Department of Chemistry, Haverford College,  
370 Lancaster Ave., Haverford, PA 19041, United States

<sup>c</sup>Department of Chemistry, Purdue University  
560 Oval Drive, West Lafayette, IN 47907, United States

<sup>d</sup>Department of Chemistry, University of Houston,  
Houston, TX 77204-5003, United States

**Figures S1-S5.** Thermal ellipsoid figures for asymmetric units of structures **1-5**.

**Figures S6-S10.** Comparisons of calculated and experimental powder X-ray diffractions patterns for compounds **1-5**.

**Figures S11-S15.** Thermogravimetric analysis traces for compounds **1-5**.

**Figures S16-S20.** Illustrations of coordination environments of independent Pb(II) atoms in **1-5**.

**Table S1.** Pb-O bond lengths and resulting bond valence sums for compounds **1-5**.

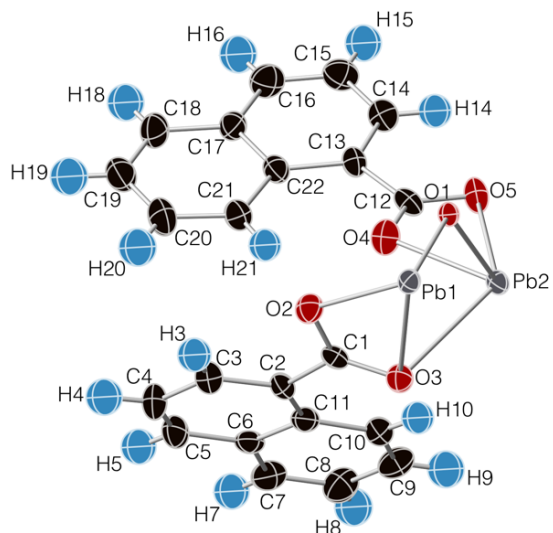

**Figure S1.** Asymmetric unit for **1**. Thermal ellipsoids for data collected at 150 K are shown at 50% probability.

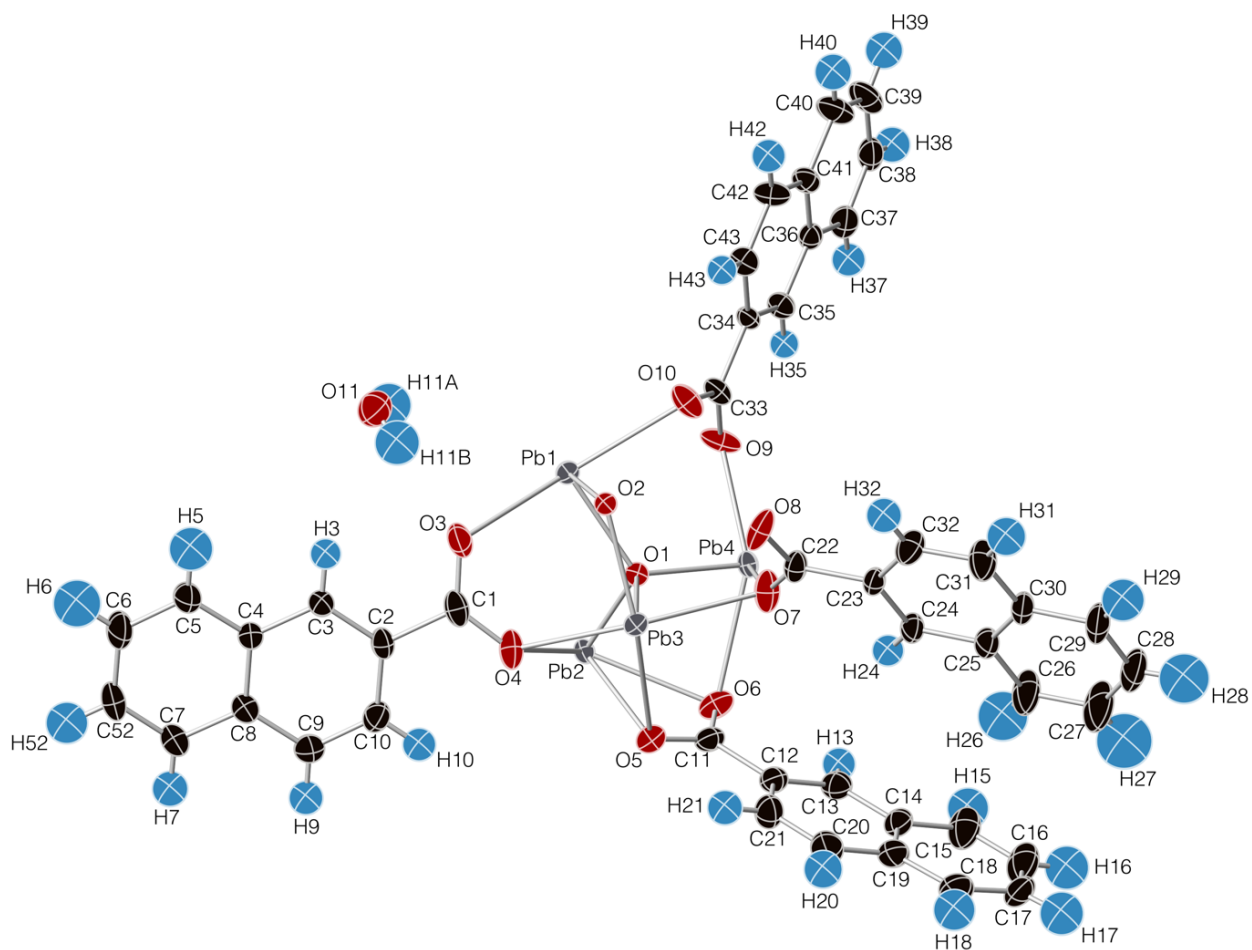

**Figure S2.** Asymmetric unit for **2**. Thermal ellipsoids for data collected at 150 K are shown at 50% probability.

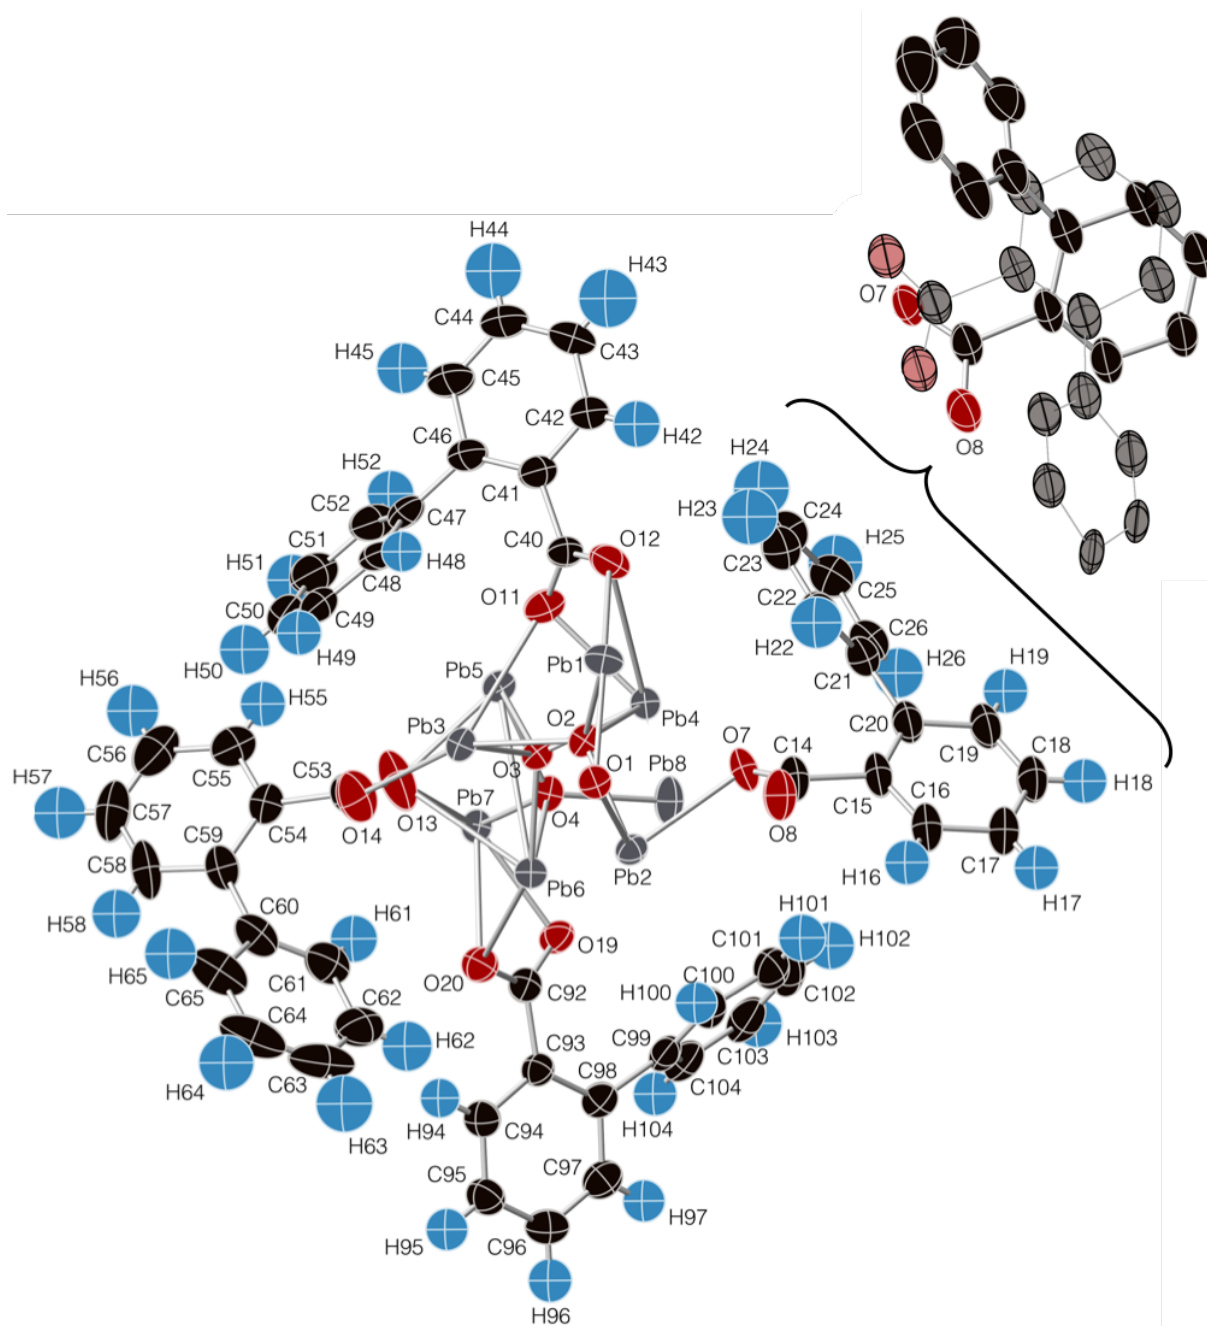

**Figure S3a.** Asymmetric unit for **3**. Four of the eight crystallographically independent ligands are shown with the inorganic substructure. Insets show 0.722 occupancy (opaque) and 0.278 occupancy (translucent) positions of disordered atoms, excluding hydrogen atoms. Thermal ellipsoids for data collected at 150 K are shown at 50% probability.

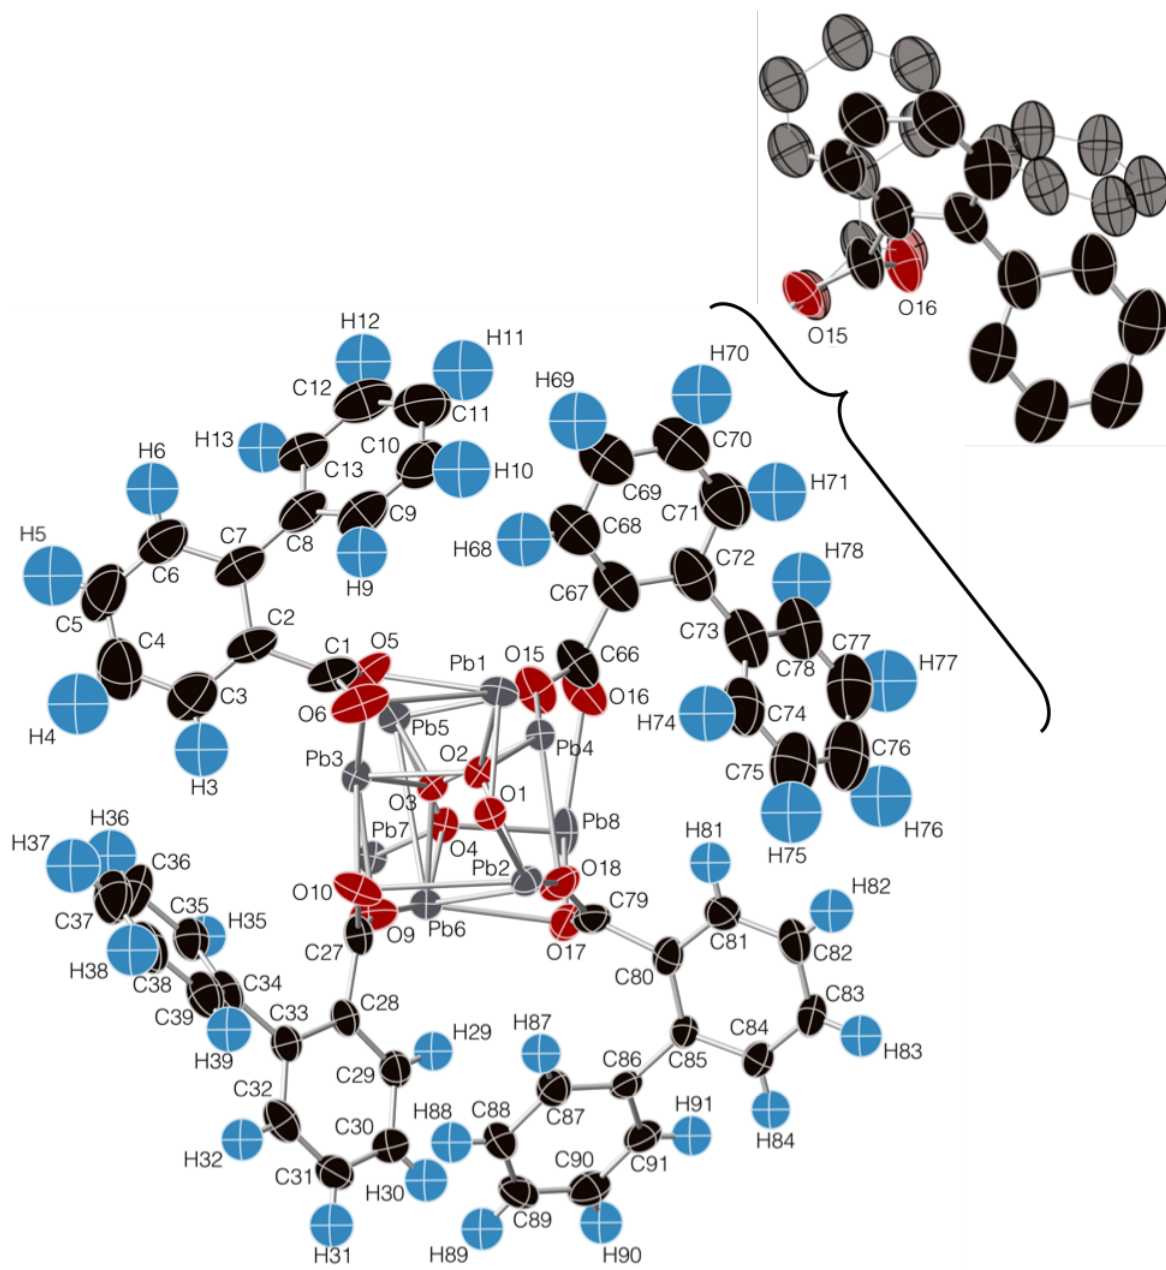

**Figure S3b.** Asymmetric unit for **3**. Four of the eight crystallographically independent ligands are shown with the inorganic substructure. Insets show 0.722 occupancy (opaque) and 0.278 occupancy (translucent) positions of disordered atoms, excluding hydrogen atoms. Thermal ellipsoids for data collected at 150 K are shown at 50% probability.

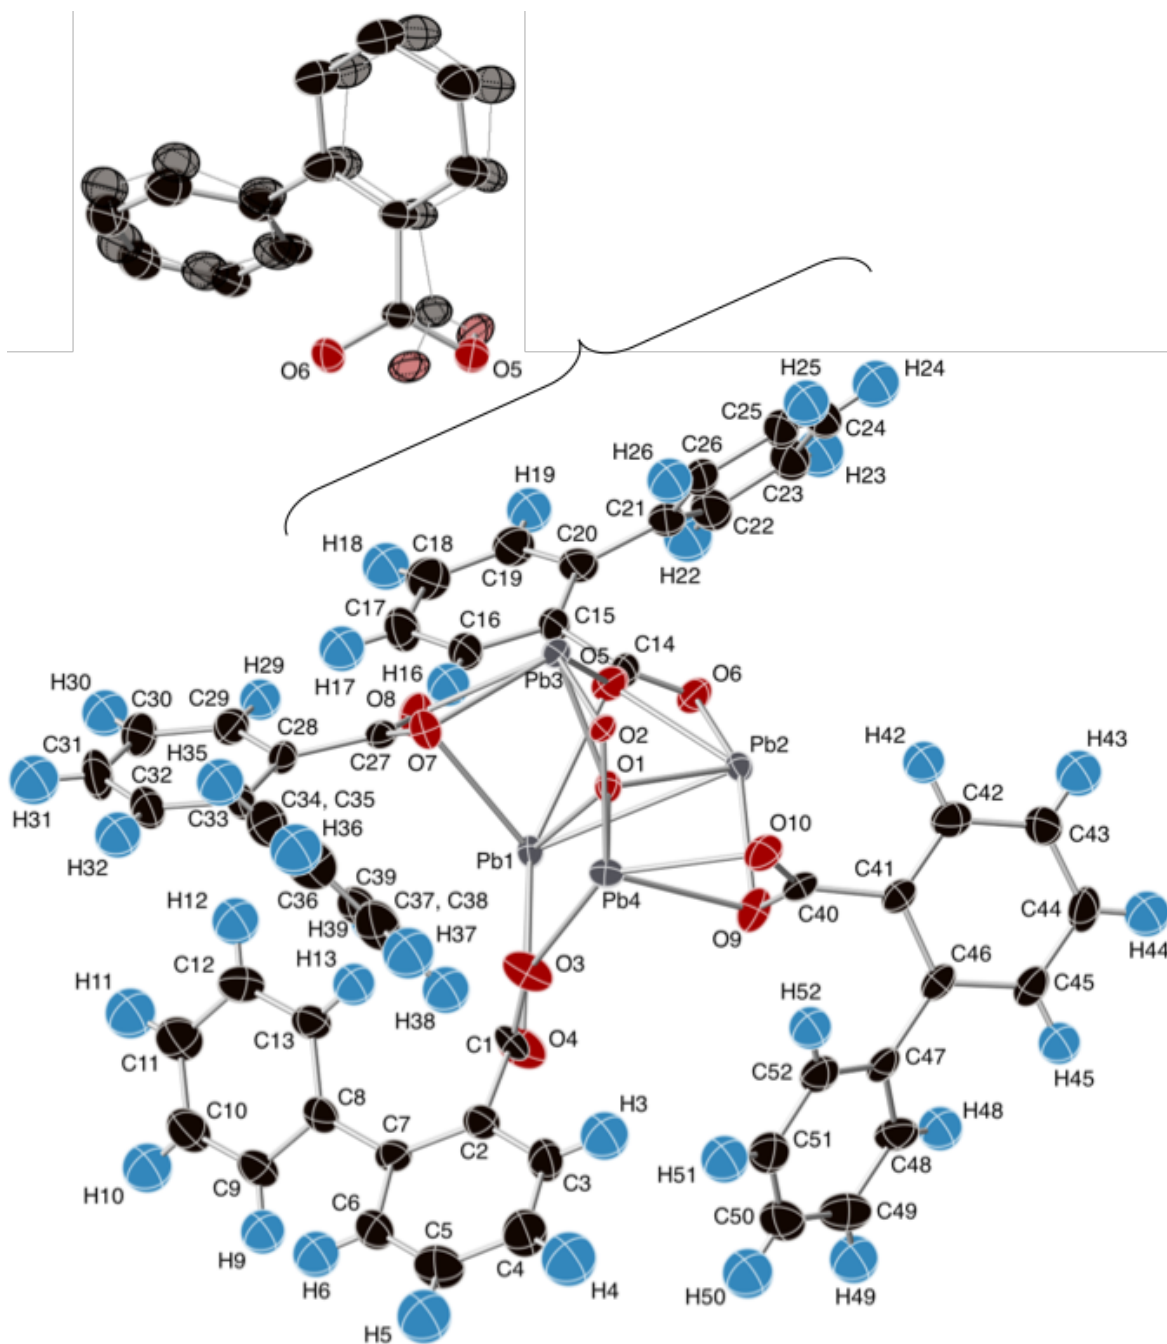

**Figure S4a.** Asymmetric unit for **4**. One of the two crystallographically unique hybrid chains. The inset shows the 0.688 occupancy (opaque) and 0.312 occupancy (translucent) positions of disordered atoms, excluding hydrogen atoms. Thermal ellipsoids for data collected at 150 K are shown at 50% probability.

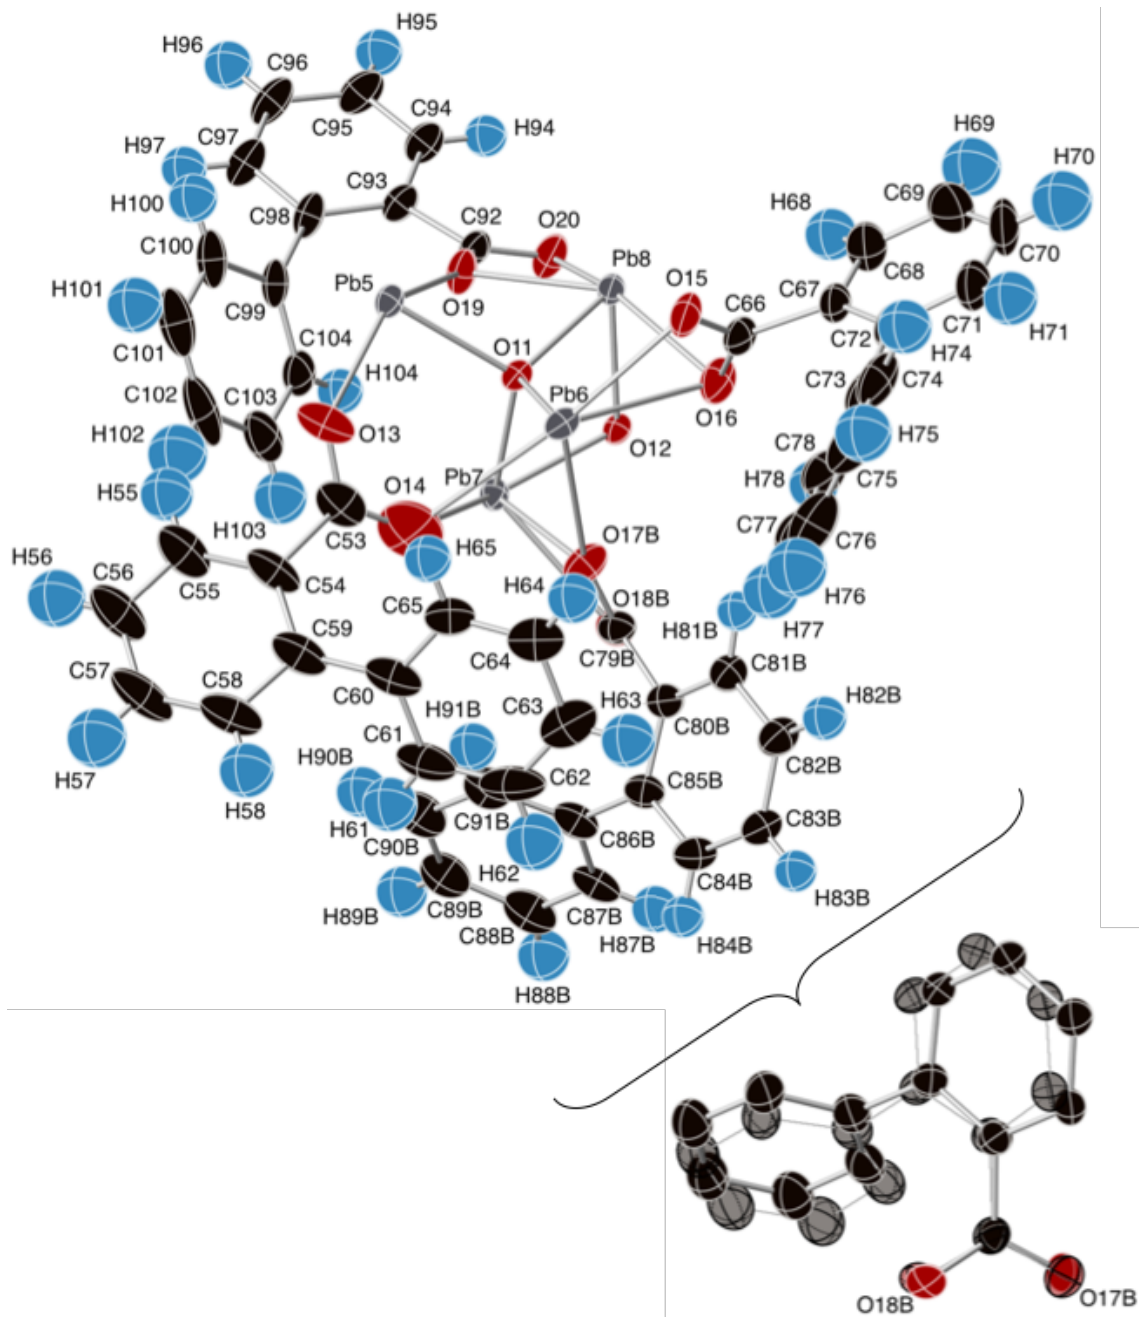

**Figure S4b.** Asymmetric unit for **4**. The second of two crystallographically unique hybrid chains. The inset shows 0.586 occupancy (opaque) and 0.414 occupancy (translucent) positions of disordered atoms, excluding hydrogen atoms. Thermal ellipsoids for data collected at 150 K are shown at 50% probability.

a)

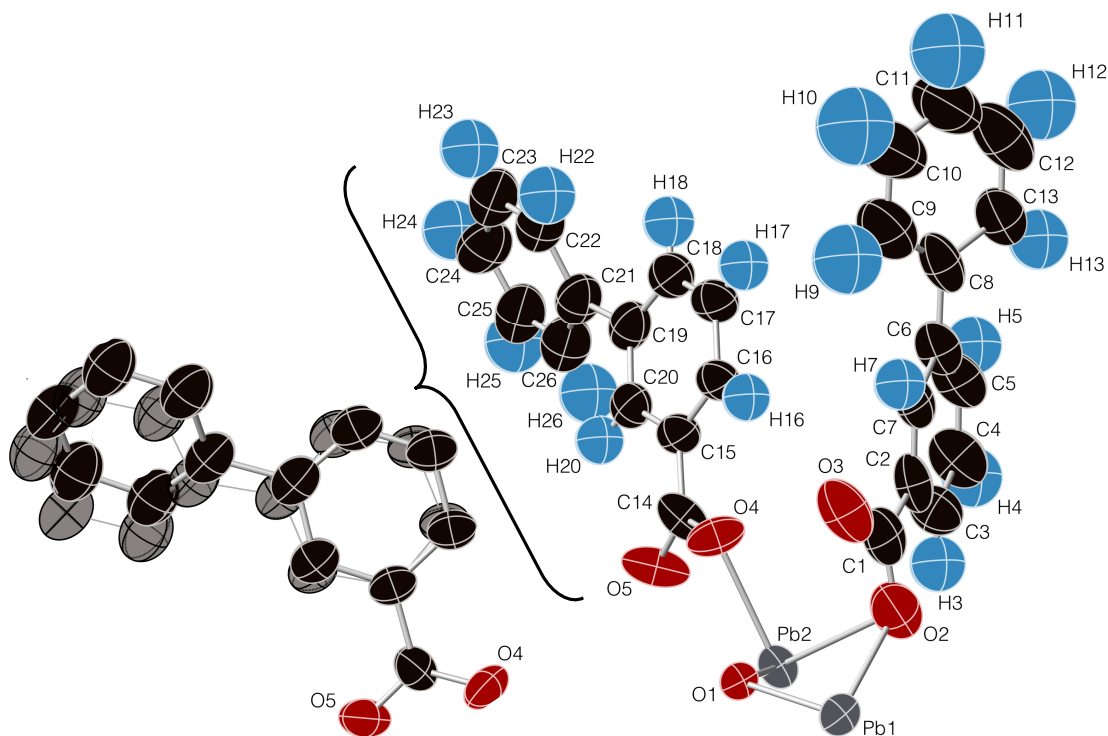

b)

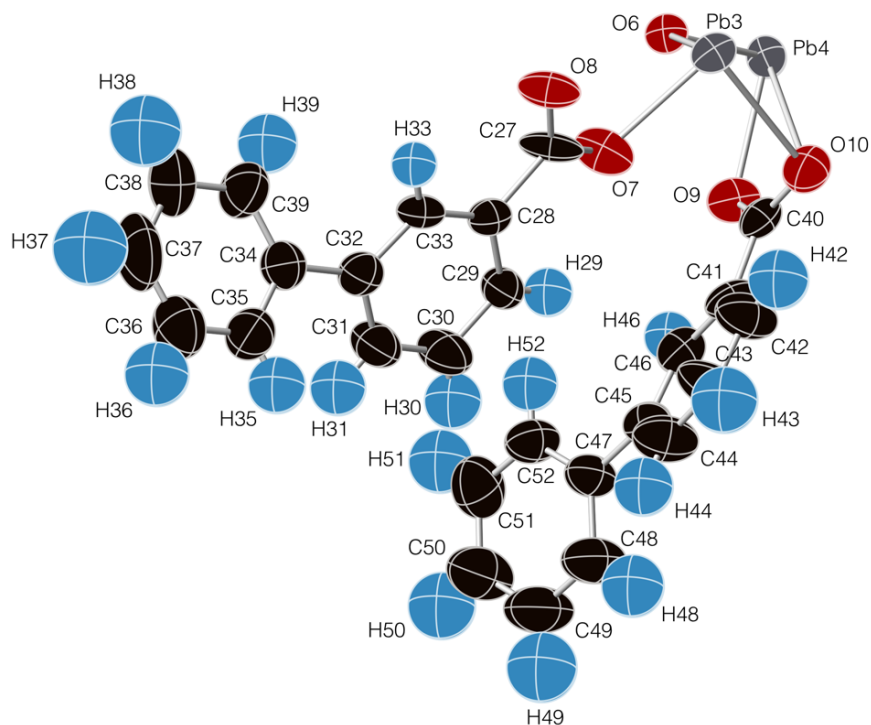

**Figure S5.** Asymmetric unit for **5**. Two crystallographically unique hybrid chains (**a**,**b**). The inset shows the 0.64 occupancy (opaque) and 0.36 occupancy (translucent) positions of disordered atoms, excluding hydrogen atoms. Thermal ellipsoids for data collected at 296 K are shown at 50% probability.

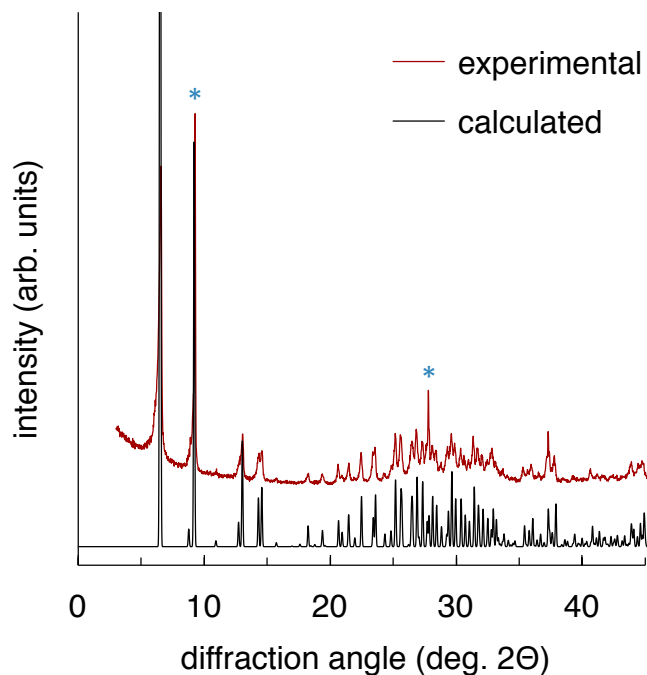

**Figure S6.** Comparison of PXRD collected at room temperature for **1** with pattern calculated from 150 K single crystal structure. Peaks designated by asterisks were identified as (220) and (660). Their high intensity in the experimental pattern is likely due to preferred orientation.

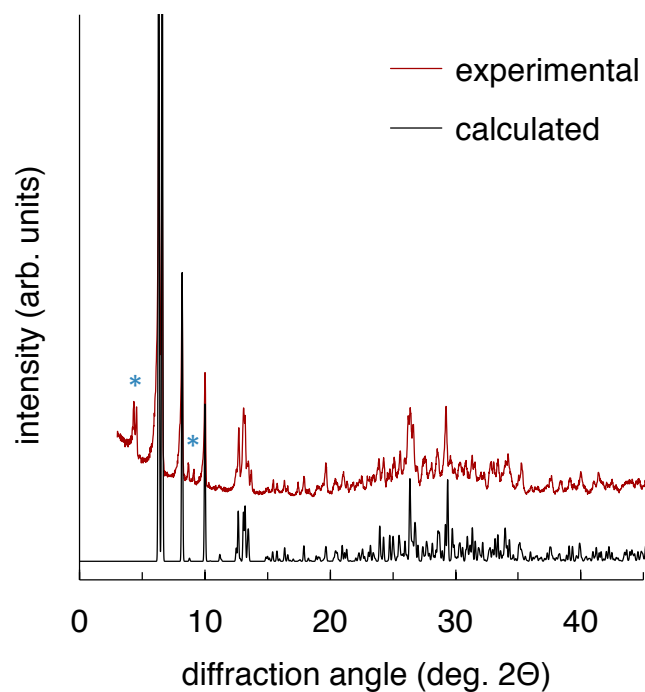

**Figure S7.** Comparison of PXRD pattern collected at room temperature for **2** with pattern calculated from 150 K single crystal structure. The two peaks designated by asterisks belong to impurities, likely including lead 2-naphthoate.



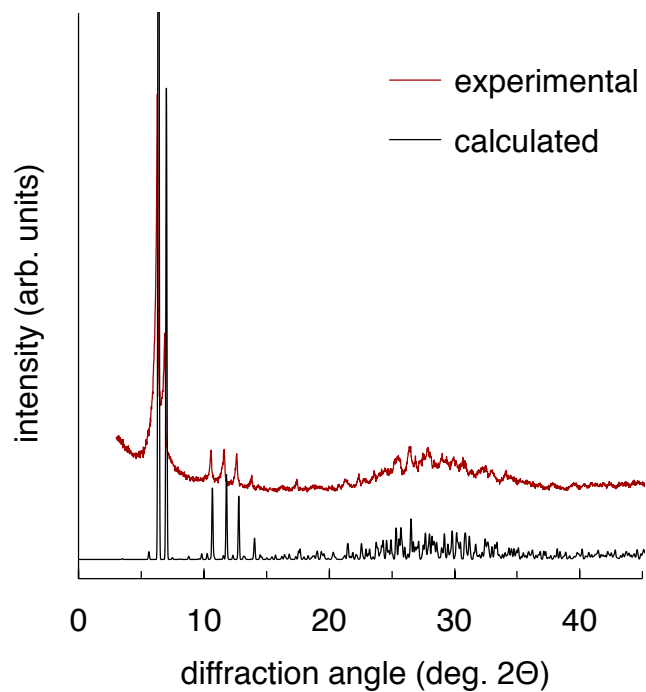

**Figure S8.** Comparison of PXR D pattern collected at room temperature for **3** with pattern calculated from 150 K single crystal structure.

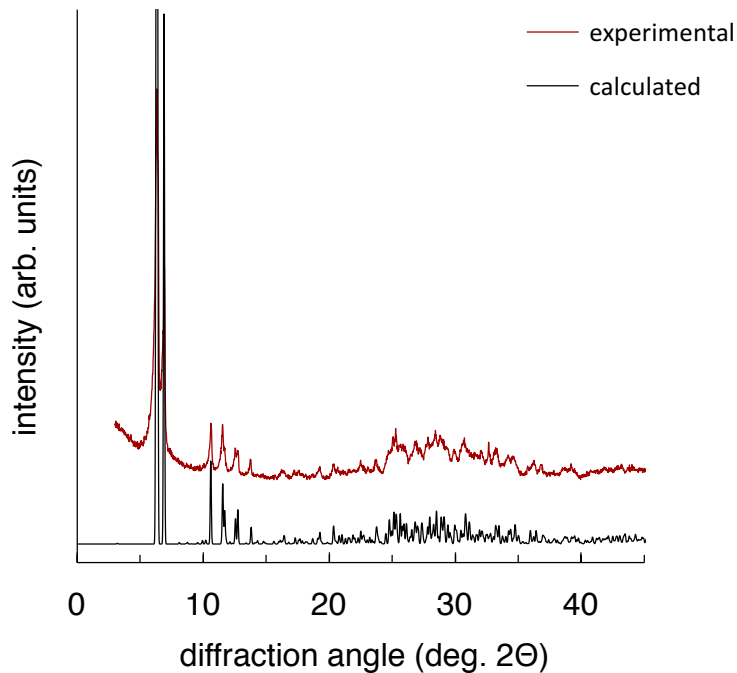

**Figure S9.** Comparison of PXR D pattern collected at room temperature for **4** with pattern calculated from 150 K single crystal structure.

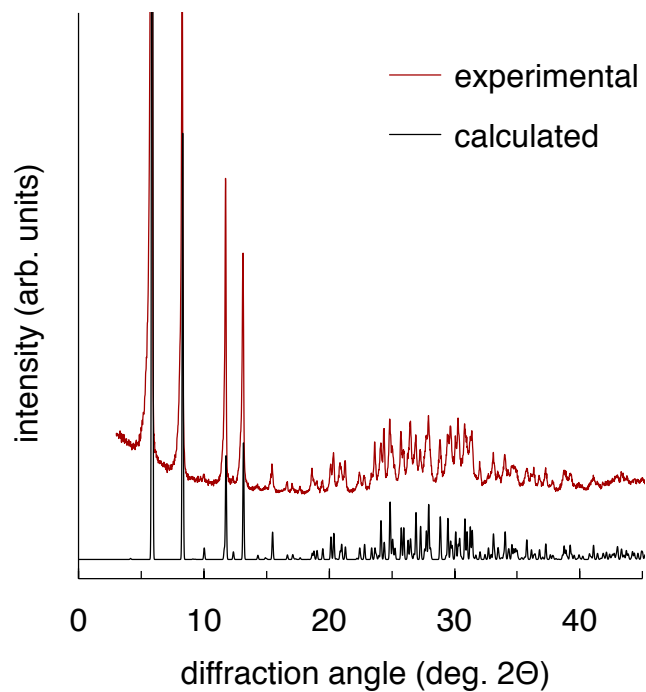

**Figure S10.** Comparison of PXRD pattern collected at room temperature for **5** with pattern calculated from 296 K single crystal structure.

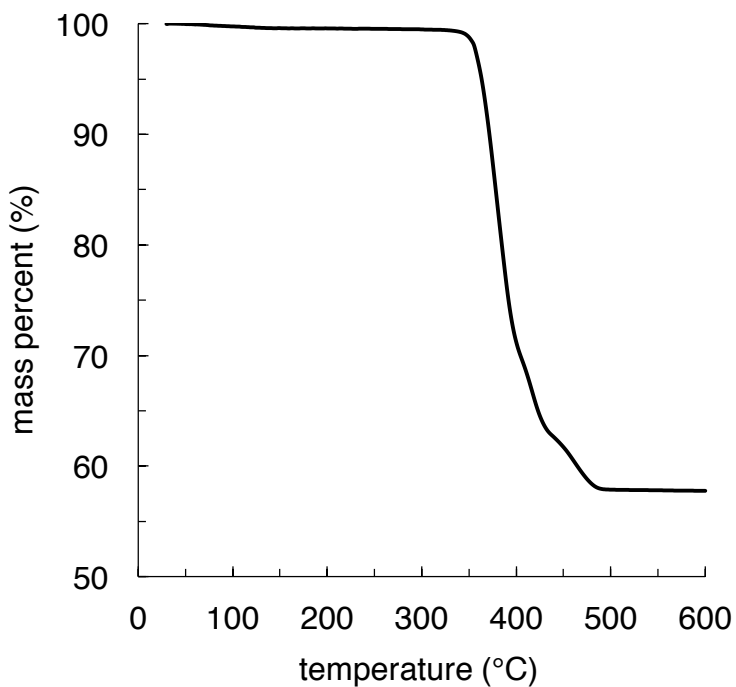

**Figure S11.** Thermogravimetric analysis trace for **1** heated to 600 °C under flowing air.

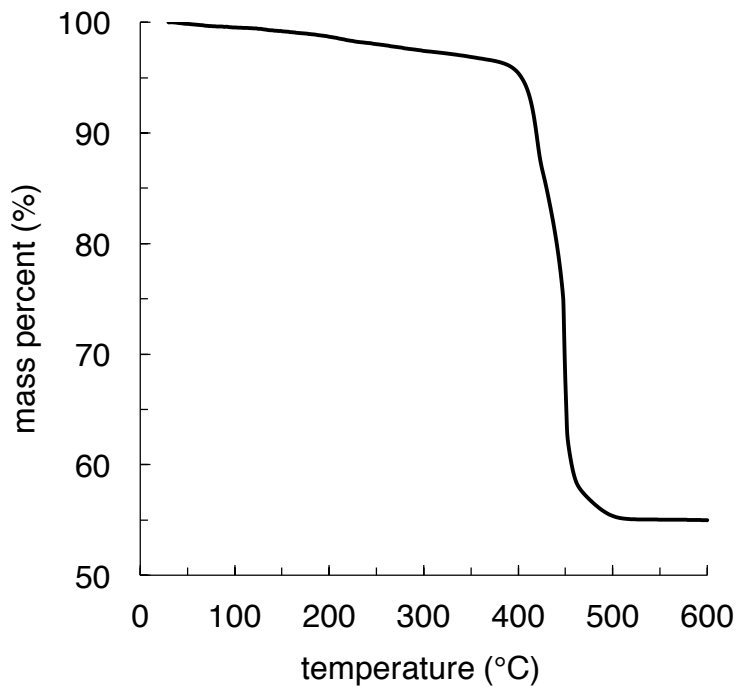

**Figure S12.** Thermogravimetric analysis trace for **2** heated to 600 °C under flowing air.

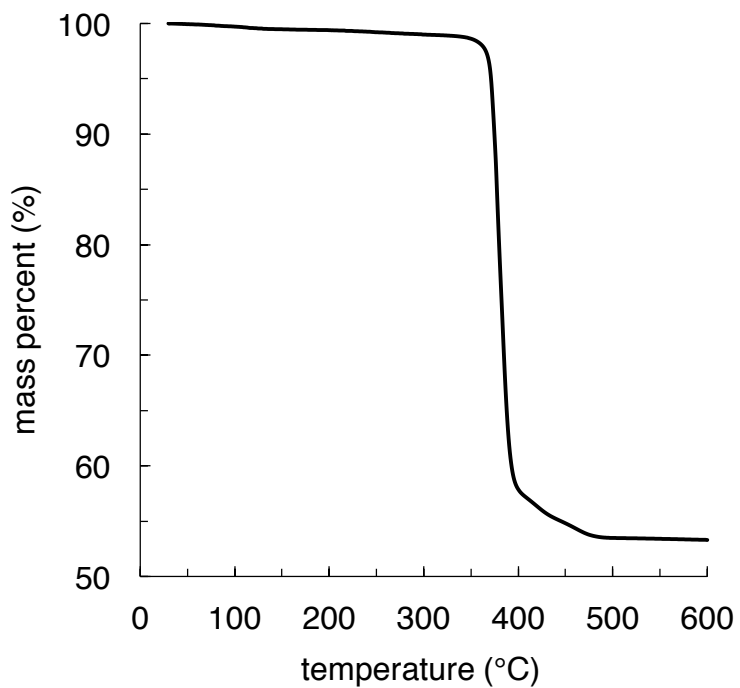

**Figure S13.** Thermogravimetric analysis trace for **3** heated to 600 °C under flowing air.

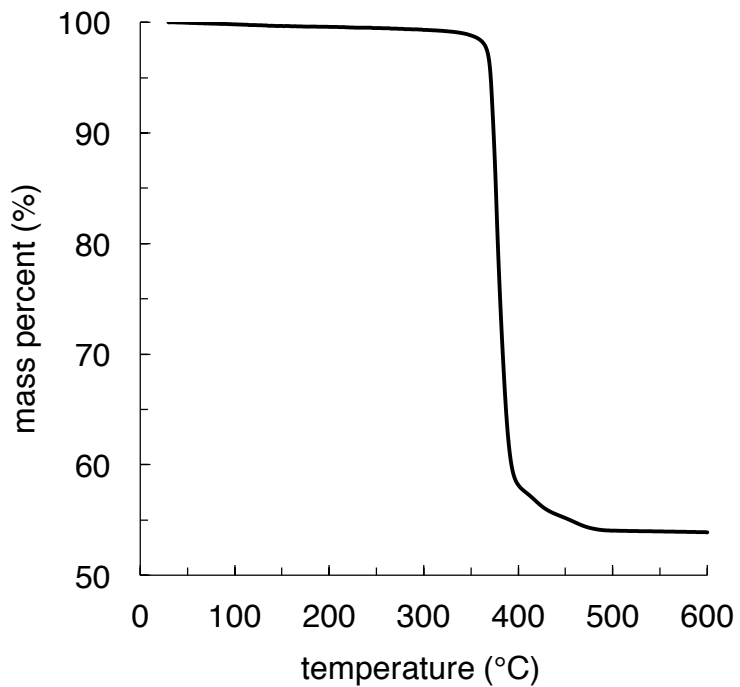

**Figure S14.** Thermogravimetric analysis trace for **4** heated to 600 °C under flowing air.

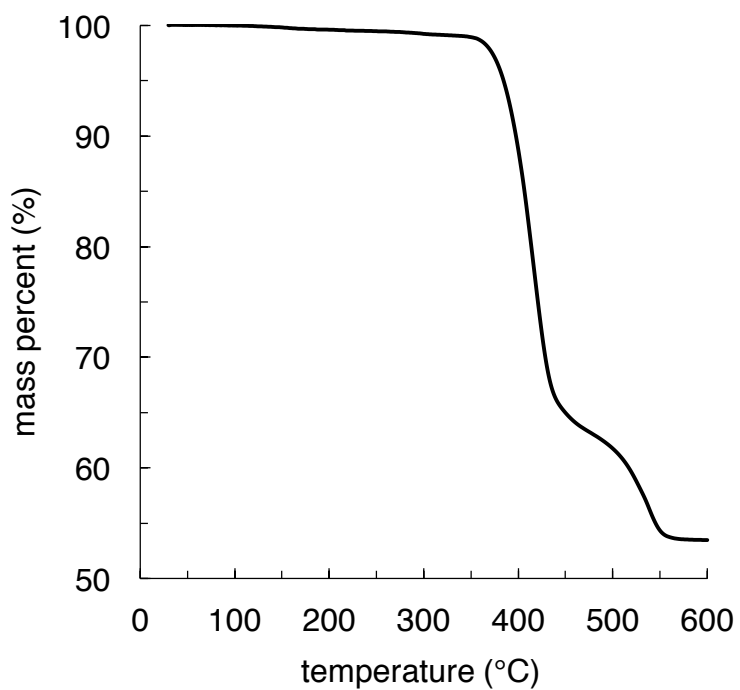

**Figure S15.** Thermogravimetric analysis trace for **5** heated to 600 °C under flowing air.

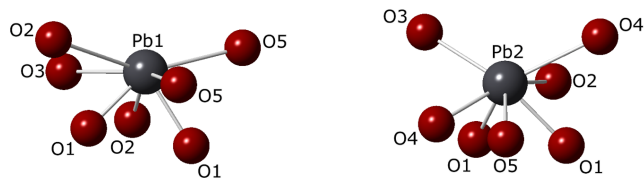

**Figure S16.** Asymmetric coordination environments of Pb atoms in **1** indicating stereoactive  $6s^2$  lone pairs.

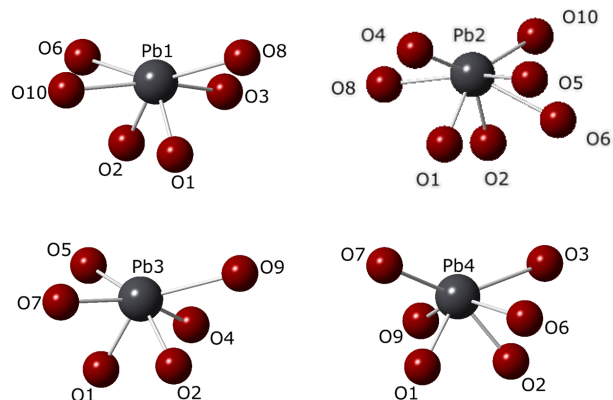

**Figure S17.** Asymmetric coordination environments of Pb atoms in **2** indicating stereoactive  $6s^2$  lone pairs.

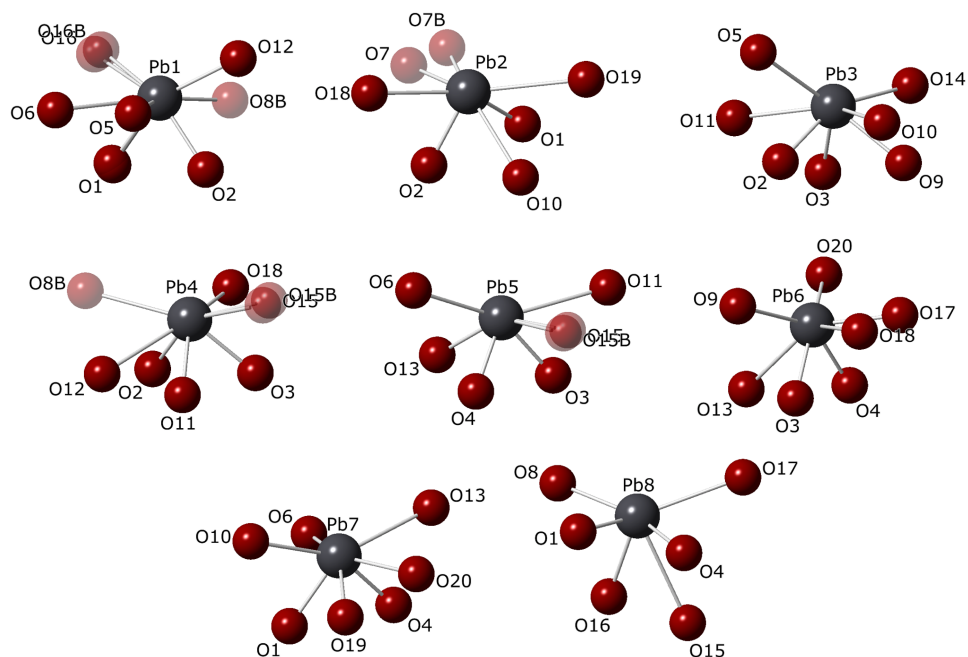

**Figure S18.** Asymmetric coordination environments of Pb atoms in **3** indicating stereoactive  $6s^2$  lone pairs. Transparent atoms are part of refined disorder and have partial occupancy. For Pb8, the metal as well as several oxygen atoms are disordered. Shown here are the major contributors.

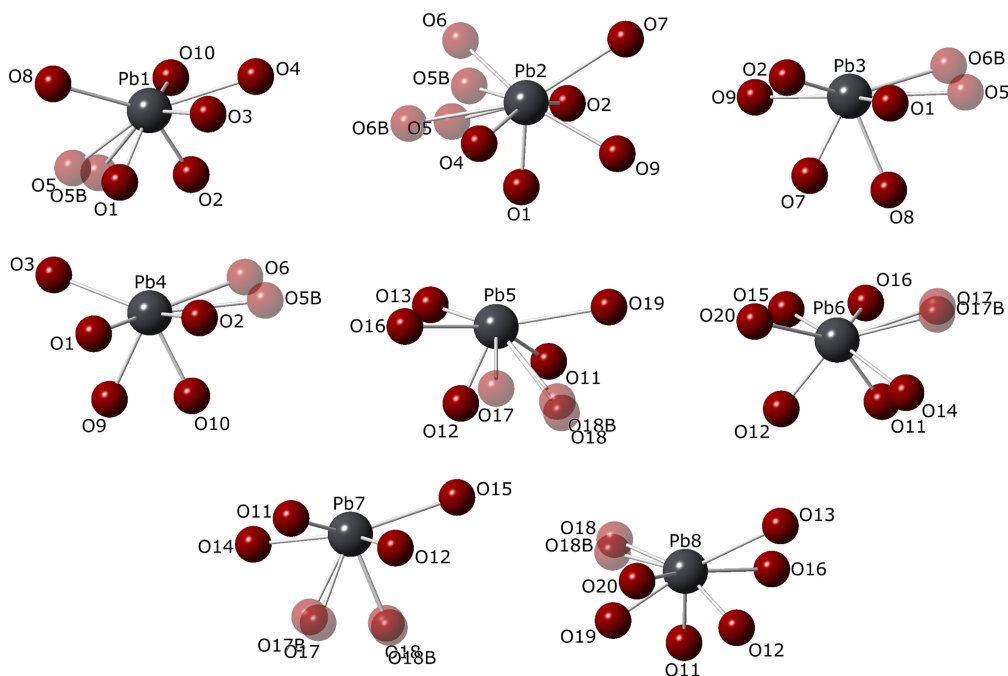

**Figure S19.** Asymmetric coordination environments of Pb atoms in **4** indicating stereoactive  $6s^2$  lone pairs. Transparent atoms are part of refined disorder and have partial occupancy.

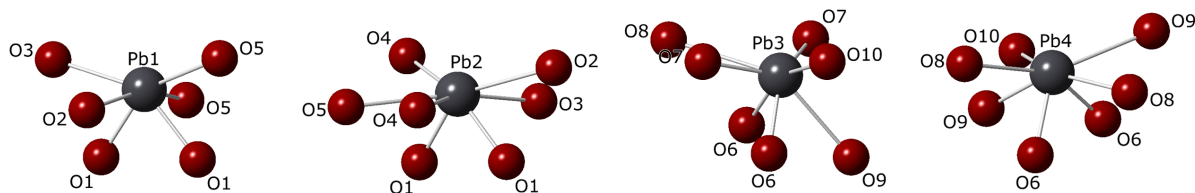

**Figure S20.** Asymmetric coordination environments of Pb atoms in **5** indicating stereoactive  $6s^2$  lone pairs.

**Table S1.** Pb-O bond lengths and resulting bond valence sums for **1-5**. Maximum contact distances to be considered in the calculations were determined by looking for gaps in histograms of Pb-O contacts, through comparison among this group of compounds as well as with previously reported lead oxide carboxylates, and through the bond valence sum calculations themselves. Contact up to 3.20 Å were used in final calculations of sums for **1, 2, 3, and 5**, with distances up to 3.22 Å included for two of the eight sites in **4**.

| compound | bond    | bond length (Å) | bond valence contribution (v.u.) |
|----------|---------|-----------------|----------------------------------|
| <b>1</b> | Pb1-O1  | 2.2597          | 0.546                            |
|          | Pb1-O1  | 2.2937          | 0.509                            |
|          | Pb1-O2  | 2.4316          | 0.384                            |
|          | Pb1-O5  | 2.7399          | 0.205                            |
|          | Pb1-O3  | 2.8902          | 0.151                            |
|          | Pb1-O5  | 2.8941          | 0.150                            |
|          | Pb1-O2  | 3.1932          | 0.081                            |
|          | total   |                 | 2.026                            |
|          | Pb2-O1  | 2.3059          | 0.497                            |
|          | Pb2-O1  | 2.3131          | 0.489                            |
|          | Pb2-O4  | 2.4524          | 0.368                            |
|          | Pb2-O3  | 2.7803          | 0.189                            |
|          | Pb2-O4  | 2.8396          | 0.167                            |
|          | Pb2-O5  | 2.8421          | 0.166                            |
| Pb2-O2   | 2.9109  | 0.144           |                                  |
| total    |         | 2.021           |                                  |
| <b>2</b> | Pb1-O2  | 2.2559          | 0.550                            |
|          | Pb1-O1  | 2.2892          | 0.514                            |
|          | Pb1-O3  | 2.5520          | 0.301                            |
|          | Pb1-O10 | 2.5575          | 0.297                            |
|          | Pb1-O8  | 2.8521          | 0.163                            |
|          | Pb1-O6  | 3.1462          | 0.089                            |
|          | total   |                 | 1.914                            |

|         |        |       |
|---------|--------|-------|
| Pb2-O1  | 2.2949 | 0.508 |
| Pb2-O2  | 2.3182 | 0.484 |
| Pb2-O8  | 2.5646 | 0.293 |
| Pb2-O6  | 2.6145 | 0.265 |
| Pb2-O5  | 2.7689 | 0.193 |
| Pb2-O10 | 2.8727 | 0.156 |
| Pb2-O4  | 2.9454 | 0.135 |

total 2.034

|        |        |       |
|--------|--------|-------|
| Pb3-O1 | 2.3040 | 0.499 |
| Pb3-O2 | 2.3066 | 0.496 |
| Pb3-O7 | 2.4975 | 0.336 |
| Pb3-O4 | 2.5464 | 0.304 |
| Pb3-O5 | 2.7500 | 0.201 |
| Pb3-O9 | 2.8226 | 0.173 |

total 2.008

|        |        |       |
|--------|--------|-------|
| Pb4-O2 | 2.2772 | 0.527 |
| Pb4-O1 | 2.2918 | 0.511 |
| Pb4-O9 | 2.3962 | 0.413 |
| Pb4-O6 | 2.6684 | 0.237 |
| Pb4-O7 | 2.9431 | 0.135 |
| Pb4-O3 | 2.9762 | 0.126 |

total 1.950

| compound | bond     | bond length<br>(Å) | fractional contribution<br>(if other than unity) | bond valence<br>contribution (v.u.) |
|----------|----------|--------------------|--------------------------------------------------|-------------------------------------|
| <b>3</b> | Pb1-O2   | 2.2766             |                                                  | 0.527                               |
|          | Pb1-O5   | 2.3399             |                                                  | 0.463                               |
|          | Pb1-O1   | 2.3467             |                                                  | 0.457                               |
|          | Pb1-O8B  | 2.4714             | 0.278                                            | 0.099                               |
|          | Pb1-O12  | 2.6429             |                                                  | 0.250                               |
|          | Pb1-O16B | 2.8843             | 0.278                                            | 0.042                               |
|          | Pb1-O16  | 3.0775             | 0.722                                            | 0.074                               |
|          | Pb1-O6   | 3.0803             |                                                  | 0.102                               |
|          |          |                    | total                                            | 2.014                               |



|          |        |       |             |
|----------|--------|-------|-------------|
| Pb2-O1   | 2.2718 |       | 0.532       |
| Pb2-O2   | 2.2787 |       | 0.525       |
| Pb2-O7B  | 2.3061 | 0.278 | 0.138       |
| Pb2-O7   | 2.4407 | 0.722 | 0.272       |
| Pb2-O18  | 2.8739 |       | 0.156       |
| Pb2-O10  | 2.9604 |       | 0.131       |
| Pb2-O19  | 3.1610 |       | 0.087       |
|          |        |       | total 1.841 |
|          |        |       |             |
| Pb3-O3   | 2.3097 |       | 0.493       |
| Pb3-O2   | 2.3389 |       | 0.464       |
| Pb3-O9   | 2.4497 |       | 0.370       |
| Pb3-O14  | 2.6764 |       | 0.233       |
| Pb3-O10  | 2.7428 |       | 0.204       |
| Pb3-O11  | 3.0035 |       | 0.120       |
| Pb3-O5   | 3.0052 |       | 0.119       |
|          |        |       | total 2.003 |
|          |        |       |             |
| Pb4-O2   | 2.2526 |       | 0.554       |
| Pb4-O3   | 2.2852 |       | 0.518       |
| Pb4-O11  | 2.4484 |       | 0.371       |
| Pb4-O18  | 2.6200 |       | 0.262       |
| Pb4-O15  | 2.7891 | 0.722 | 0.134       |
| Pb4-O15B | 2.9472 | 0.278 | 0.037       |
| Pb4-O8B  | 2.9692 | 0.278 | 0.036       |
| Pb4-O12  | 3.0316 |       | 0.113       |
|          |        |       | total 2.024 |
|          |        |       |             |
| Pb5-O3   | 2.2642 |       | 0.541       |
| Pb5-O4   | 2.2662 |       | 0.539       |
| Pb5-O13  | 2.4226 |       | 0.391       |
| Pb5-O15  | 2.5258 | 0.722 | 0.229       |
| Pb5-O6   | 2.8710 |       | 0.157       |
| Pb5-O15B | 2.5866 | 0.278 | 0.078       |
| Pb5-O11  | 3.1055 |       | 0.097       |
|          |        |       | total 2.032 |

|         |        |       |
|---------|--------|-------|
| Pb6-O3  | 2.2743 | 0.530 |
| Pb6-O4  | 2.2938 | 0.509 |
| Pb6-O17 | 2.4816 | 0.347 |
| Pb6-O9  | 2.7840 | 0.187 |
| Pb6-O20 | 2.9029 | 0.147 |
| Pb6-O13 | 2.9991 | 0.121 |
| Pb6-O18 | 3.0082 | 0.118 |

total 1.959

|         |        |       |
|---------|--------|-------|
| Pb7-O4  | 2.3014 | 0.501 |
| Pb7-O1  | 2.3717 | 0.434 |
| Pb7-O19 | 2.4049 | 0.406 |
| Pb7-O6  | 2.7154 | 0.215 |
| Pb7-O10 | 2.7225 | 0.212 |
| Pb7-O20 | 2.7857 | 0.187 |
| Pb7-O13 | 3.0997 | 0.098 |

total 2.054

|         |        |       |
|---------|--------|-------|
| Pb8-O1  | 2.2385 | 0.570 |
| Pb8-O4  | 2.3192 | 0.483 |
| Pb8-O16 | 2.4709 | 0.355 |
| Pb8-O8  | 2.6639 | 0.239 |
| Pb8-O17 | 2.9769 | 0.126 |
| Pb8-O15 | 3.1949 | 0.081 |

total 1.854

| compound | bond    | bond length<br>(Å) | fractional contribution<br>(if other than unity) | bond valence<br>contribution (v.u.) |
|----------|---------|--------------------|--------------------------------------------------|-------------------------------------|
| 4        | Pb1-O2  | 2.2637             |                                                  | 0.541                               |
|          | Pb1-O1  | 2.3314             |                                                  | 0.471                               |
|          | Pb1-O3  | 2.3884             |                                                  | 0.420                               |
|          | Pb1-O10 | 2.7927             |                                                  | 0.184                               |
|          | Pb1-O5  | 2.7970             | 0.688                                            | 0.125                               |
|          | Pb1-O8  | 2.8902             |                                                  | 0.151                               |
|          | Pb1-O5B | 2.9444             | 0.312                                            | 0.042                               |
|          | Pb1-O4  | 2.9544             |                                                  | 0.132                               |
|          |         |                    | total                                            | 2.067                               |

|          |        |       |             |
|----------|--------|-------|-------------|
| Pb2-O2   | 2.2579 |       | 0.548       |
| Pb2-O1   | 2.3108 |       | 0.492       |
| Pb2-O5B  | 2.3834 | 0.312 | 0.132       |
| Pb2-O5   | 2.4933 | 0.688 | 0.233       |
| Pb2-O9   | 2.8128 |       | 0.177       |
| Pb2-O4   | 3.0029 |       | 0.120       |
| Pb2-O6   | 3.0298 | 0.688 | 0.078       |
| Pb2-O7   | 3.1240 |       | 0.094       |
| Pb2-O6B  | 3.2161 | 0.312 | 0.024       |
|          |        |       | total 1.897 |
|          |        |       |             |
| Pb3-O1   | 2.2716 |       | 0.533       |
| Pb3-O2   | 2.3468 |       | 0.457       |
| Pb3-O7   | 2.3912 |       | 0.417       |
| Pb3-O8   | 2.6848 |       | 0.229       |
| Pb3-O6B  | 2.8572 | 0.312 | 0.161       |
| Pb3-O5   | 2.8769 | 0.688 | 0.048       |
| Pb3-O4   | 3.0701 |       | 0.072       |
|          |        |       | total 1.988 |
|          |        |       |             |
| Pb4-O1   | 2.2863 |       | 0.517       |
| Pb4-O2   | 2.3104 |       | 0.492       |
| Pb4-O10  | 2.4788 |       | 0.349       |
| Pb4-O9   | 2.6028 |       | 0.271       |
| Pb4-O3   | 2.8140 |       | 0.176       |
| Pb4-O6   | 2.8494 | 0.688 | 0.113       |
| Pb4-O5B  | 3.0648 | 0.312 | 0.033       |
|          |        |       | total 1.951 |
|          |        |       |             |
| Pb5-O12  | 2.2686 |       | 0.536       |
| Pb5-O11  | 2.2794 |       | 0.524       |
| Pb5-O13  | 2.3963 |       | 0.413       |
| Pb5-O18B | 2.8775 | 0.586 | 0.091       |
| Pb5-O16  | 2.9614 |       | 0.130       |
| Pb5-O19  | 3.0369 |       | 0.112       |
| Pb5-O17  | 3.0603 | 0.414 | 0.107       |
| Pb5-O18  | 3.2062 | 0.414 | 0.033       |
|          |        |       | total 1.945 |

|          |        |       |       |
|----------|--------|-------|-------|
| Pb6-O11  | 2.2840 |       | 0.519 |
| Pb6-O12  | 2.3444 |       | 0.459 |
| Pb6-O15  | 2.4848 |       | 0.345 |
| Pb6-O17B | 2.7305 | 0.586 | 0.122 |
| Pb6-O17  | 2.8034 | 0.414 | 0.074 |
| Pb6-O16  | 2.8679 |       | 0.158 |
| Pb6-O14  | 2.9303 |       | 0.139 |
| Pb6-O20  | 2.9733 |       | 0.127 |
|          |        | total | 1.944 |

|          |        |       |       |
|----------|--------|-------|-------|
| Pb7-O12  | 2.2703 |       | 0.534 |
| Pb7-O11  | 2.2855 |       | 0.518 |
| Pb7-O17B | 2.4409 | 0.586 | 0.221 |
| Pb7-O17  | 2.5490 | 0.414 | 0.125 |
| Pb7-O18  | 2.6171 | 0.414 | 0.109 |
| Pb7-O18B | 2.6890 | 0.586 | 0.133 |
| Pb7-O14  | 2.8067 |       | 0.179 |
| Pb7-O15  | 3.0142 |       | 0.117 |
|          |        | total | 1.936 |

|          |        |       |       |
|----------|--------|-------|-------|
| Pb8-O12  | 2.3037 |       | 0.499 |
| Pb8-O11  | 2.3351 |       | 0.468 |
| Pb8-O19  | 2.4004 |       | 0.410 |
| Pb8-O18B | 2.6666 | 0.586 | 0.139 |
| Pb8-O18  | 2.7445 | 0.414 | 0.084 |
| Pb8-O16  | 2.8007 |       | 0.181 |
| Pb8-O20  | 2.8015 |       | 0.181 |
| Pb8-O13  | 3.1878 |       | 0.082 |
|          |        | total | 2.044 |

| compound | bond   | bond length (Å) | bond valence contribution (v.u.) |
|----------|--------|-----------------|----------------------------------|
| <b>5</b> | Pb1-O1 | 2.2581          | 0.548                            |
|          | Pb1-O1 | 2.3518          | 0.452                            |
|          | Pb1-O2 | 2.4592          | 0.363                            |
|          | Pb1-O5 | 2.6190          | 0.262                            |
|          | Pb1-O3 | 2.7714          | 0.192                            |
|          | Pb1-O5 | 2.8675          | 0.158                            |
|          |        |                 | total                            |

|        |        |       |
|--------|--------|-------|
| Pb2-O1 | 2.2782 | 0.526 |
| Pb2-O1 | 2.2888 | 0.514 |
| Pb2-O4 | 2.4822 | 0.347 |
| Pb2-O3 | 2.6996 | 0.222 |
| Pb2-O4 | 2.8943 | 0.149 |
| Pb2-O2 | 3.0881 | 0.101 |
| Pb2-O5 | 3.1398 | 0.091 |

total 1.950

|         |        |       |
|---------|--------|-------|
| Pb3-O6  | 2.2986 | 0.504 |
| Pb3-O6  | 2.3099 | 0.493 |
| Pb3-O7  | 2.3753 | 0.431 |
| Pb3-O10 | 2.7940 | 0.183 |
| Pb3-O7  | 2.8821 | 0.153 |
| Pb3-O9  | 2.9059 | 0.146 |
| Pb3-O8  | 3.1992 | 0.080 |

total 1.991

|         |        |       |
|---------|--------|-------|
| Pb4-O6  | 2.2754 | 0.529 |
| Pb4-O6  | 2.3073 | 0.495 |
| Pb4-O9  | 2.4106 | 0.401 |
| Pb4-O8  | 2.6816 | 0.231 |
| Pb4-O8  | 2.7823 | 0.188 |
| Pb4-O10 | 2.9863 | 0.124 |
| Pb4-O9  | 3.0278 | 0.114 |

total 2.081
